# Supplementary material
Source: ML conference proceedings conference paper supplement (https://openaccess.thecvf.com/content/CVPR2025/html/Hu_Towards_Better_Alignment_CVPR_2025_paper.html)
Supplement: Supplementary file 1 [file Hu_Towards_Better_Alignment_CVPR_2025_supplemental.pdf]

The **Appendix** is organized as follows:

- **Appendix A:** discusses the potential broader impacts of our work.
- **Appendix B:** gives the list of abbreviations and symbols in our paper.
- **Appendix C:** gives a comprehensive discussion on the challenge of sparse reward.
- **Appendix D:** provides more details on implementation (e.g., experimental resources and hyperparameters).
- **Appendix E:** provides pseudo-code of B<sup>2</sup>-DiffuRL.
- **Appendix F:** gives an discussion on evaluation metrics, including comparison between BERTScore and CLIP-Score, and inception score.
- **Appendix G:** provides more image samples generated by the diffusion models fine-tuned with B<sup>2</sup>-DiffuRL.
- **Appendix H:** provides the prompt lists used in our experiments.

## A. Broader Impacts

Generative models, particularly diffusion models, are powerful productivity tools with significant potential for positive applications. However, their misuse can lead to undesirable consequences. Our research focuses on improving the prompt-image alignment of diffusion models, enhancing their accuracy and usefulness in fields such as medical image synthesis. While these advancements have clear benefits, they also pose risks, including the creation of false information that can mislead the public and manipulate public opinion. Therefore, ensuring reliable detection of synthesized content is crucial to mitigate the potential harm associated with generative models.

## B. Abbreviation and Symbol Table

The list of important abbreviations and symbols in this paper goes as Table 4.

## C. A Comprehensive Discussion on Sparse Rewards

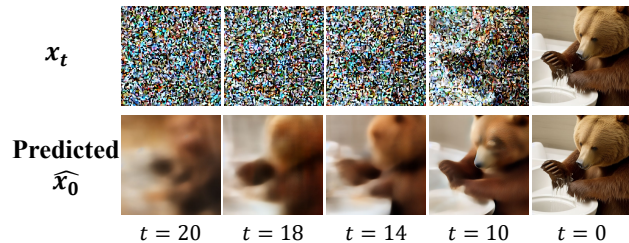

Figure 10. (Examples for Predicted  $\hat{x}_0$ ) This figure shows the  $x_t$  and predicted  $\hat{x}_0$  in the denoising process.

(1) *How does the sparse reward make a negative impact on RL-based diffusion models fine-tuning?* The reward is sparse when we execute RL-based diffusion models fine-tuning, since only the final image  $x_0$  is available to evaluate

the text-image alignment. Previous works such as DDPO and DPOK have to treat the denoising actions at different timesteps equally and set  $r_{T-1} = r_{T-2} = \dots = r_0$ . However, we argue that the denoising actions  $a_t$  on different timesteps have different effects on alignment, and the unreasonable reward setting is not conducive to learning. For example, as shown in Figure 11, the images  $x_0^1$ ,  $x_0^2$ , and  $x_0^3$  have the same parent node  $x_{14}^1$  but different text-image alignment scores. The reason for their difference is that different denoising actions  $a_{13:1}$  (instead of  $a_{20:14}$ ). Therefore, it is inappropriate to use sparse reward  $r_0$  to reward denoising actions  $a_{20:14}$ . Besides, as shown in Table 5, the differences in alignment results under the same branch are common, even with a small number of timesteps  $T = 20$ . This reveals the universality of the sparse reward problem.

(2) *Why not directly calculate the alignment score of the predicted  $\hat{x}_0$  at each timestep  $t$ ?* Each DDPM or DDIM denoising step can generate a corresponding predicted  $\hat{x}_0$  using  $x_t$  and the predicted  $\epsilon$ . However, as shown in Figure 10, the predicted  $\hat{x}_0$  at most denoising steps is unclear. We do not think that the reward function for final images can make an accurate evaluation of intermediate images.

(3) *How do the proposed BPT and BS strategies help to mitigate the sparse reward issue?* BPT allows diffusion models to focus on specific training intervals (from  $\tau$  to 0) rather than all timesteps (from  $T$  to 0). As training progresses,  $a_{\tau:1}$  turn to align better, thus the alignment is more determined by  $a_{T:\tau+1}$ , and the final reward is more accurate for  $a_{T:\tau+1}$ . That is, BPT helps to assign more appropriate rewards to denoising actions  $a_{T:\tau+1}$ . BS samples different images from the same parent node  $x_\tau$  and selects the best one and the worst one to form a contrastive sample pair. By comparing the contrastive sample pair, BS can provide more accurate rewards for denoising actions  $a_{\tau:1}$ , since the images within the same branch have the same state  $s_\tau$ . Moreover, since the contrastive samples share high-level visual semantics such as image style, the models do not learn to generate images with a specific style. This is why our proposed strategies preserve higher diversity compared to naive RL algorithms.

## D. Implementation Details

### D.1. Implementation of Our Method

**Proximal Policy Optimization.** Following DDPO, we apply proximal policy optimization (PPO) algorithm [57], a commonly used family of policy gradient (PG) algorithm for reinforcement learning. And we perform importance sampling  $\frac{p_\theta(x_{t-1}|x_t,c)}{p_{\theta_{old}}(x_{t-1}|x_t,c)}$  and clipping [57] to implement PPO.

**Extensence of Training Interval.** When employing backward progressive training, the training interval will extend gradually to cover all timesteps of the denoising process. In

| Abbreviation/Symbol                      | Meaning                                                   |
|------------------------------------------|-----------------------------------------------------------|
| <i>Abbreviations of Concepts</i>         |                                                           |
| DM                                       | Diffusion Model                                           |
| RL                                       | Reinforcement Learning                                    |
| SD                                       | Stable Diffusion                                          |
| LoRA                                     | Low-Rank Adaptation                                       |
| DDIM                                     | Denoising Diffusion Implicit Model                        |
| CLIP                                     | Contrastive Language-Image Pre-Training                   |
| BERT                                     | Bidirectional Encoder Representation from Transformers    |
| IS                                       | Inception Score                                           |
| <i>Abbreviations of Approaches</i>       |                                                           |
| B <sup>2</sup> -DiffuRL                  | BPT and BS for Reinforcement Learning in Diffusion models |
| BPT                                      | Backward Progressive Training                             |
| BS                                       | Branch-based Sampling                                     |
| DDPO                                     | Denoising Diffusion Policy Optimization                   |
| DPOK                                     | Diffusion Policy Optimization with KL regularization      |
| PG                                       | Policy Gradient algorithm                                 |
| DPO                                      | Direct Preference Optimization                            |
| <i>Symbols of Diffusion Models</i>       |                                                           |
| $x_0$                                    | Generated image                                           |
| $x_t$                                    | Image with noise at timestep $t$                          |
| $c$                                      | Condition for image generation, also called prompt        |
| $\theta$                                 | Parameters of the diffusion model                         |
| $\mu_\theta, \Sigma_\theta$              | Mean and variance predicted by the diffusion model        |
| $\mathcal{N}()$                          | Gaussian distribution                                     |
| $T$                                      | Total timesteps                                           |
| $[\tau, 1]$                              | Training interval from timestep $\tau$ to 1               |
| <i>Symbols of Reinforcement Learning</i> |                                                           |
| $s_t$                                    | State at timestep $t$                                     |
| $a_t$                                    | Action at timestep $t$                                    |
| $\pi_\theta$                             | Action selection policy parameterized by $\theta$         |
| $r()$                                    | Reward function                                           |
| $\hat{r}()$                              | Reward function with normalization                        |

Table 4. List of important abbreviations and symbols.

practice, we use a linear expansion strategy. That is, given the initial training interval  $[\tau_0, 1]$ , the total timesteps  $T$  and total number of training round  $N$ , the training interval in round  $n$  is  $[\tau_0 + \lfloor \frac{T-\tau_0+1}{N} \rfloor, 1]$ .

**Reward Normalization.** The prompt-image alignment scores given by CLIP or BERT need to be normalized before being used as rewards in training. In practice, we compute the mean and variance of the scores for each training round, with the images generated by the same prompt in the current round and in the past several rounds. Then the score can be normalized as  $\frac{\text{score}-\text{mean}}{\text{variance}}$ . When computing mean and variance, we incorporate images from the past rounds into calculation, because calculation using only images from one single round may be inaccurate. However,

we only use images from the past few rounds, instead of all rounds, in the consideration that the scores of images multiple rounds ago differ greatly from those in current round as fine-tuning progresses, and are not suitable for estimating mean and variance of current round. In practice, we use images from the past 8 training rounds.

**Compatibility with Policy Gradient.** When applying PG, the value function  $V(x_\tau, c)$  should be considered. In our implementation, we replace value function with the reward normalization mentioned above. What’s more, the importance sampling  $\frac{p_\theta(x_{t-1}|x_t, c)}{p_{\theta_{old}}(x_{t-1}|x_t, c)}$  is also applied to improve stability of training. Therefore, the optimization objective of PG in our setting is the same as Eq. (6), but without using the clipping in PPO.

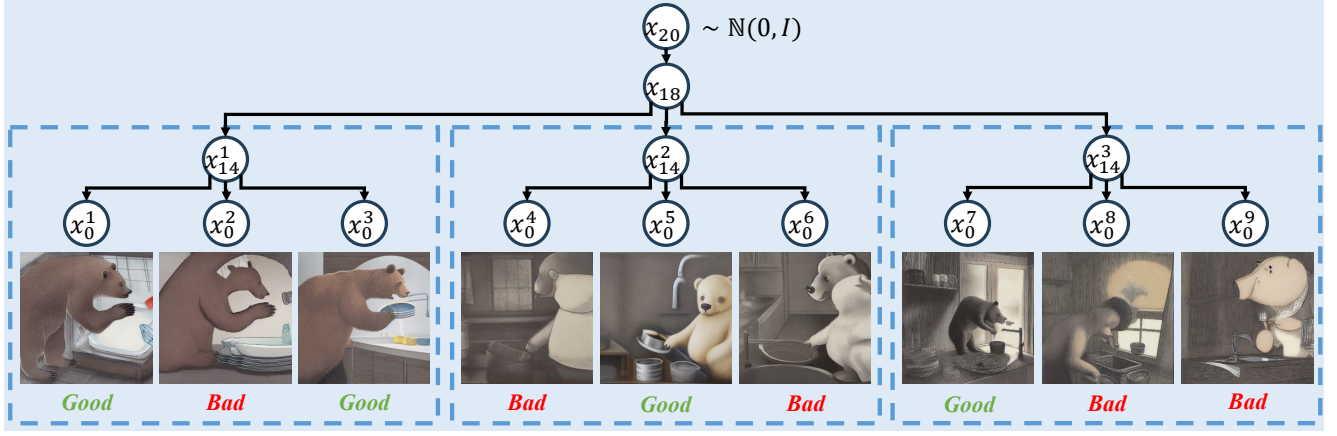

Figure 11. **(Examples Showing the Problem of Sparse Reward)** For these examples, the number of denoising timesteps  $T$  is set to 20, and the prompt is “a bear washing dishes”. The images are denoised from the same  $x_{18}$  with different seeds, and every 3 images are denoised from the same  $x_{14}$  with different seeds. As we can see, the images denoised from the same parent node  $x_{18}$  or  $x_{14}$  can get different alignment scores. We can not tell whether  $x_{18}/x_{14}$  is good or bad from one final image. Consequently, it is inappropriate to use the reward for the last timesteps as the reward for the whole denoising process.

| Timestep when Branching | 2    | 4     | 6     | 8     | 10    | 12    | 14    | 16    | 18    | 20    |
|-------------------------|------|-------|-------|-------|-------|-------|-------|-------|-------|-------|
| Proportion              | 8.2% | 16.8% | 15.6% | 28.1% | 28.9% | 34.0% | 43.0% | 44.5% | 52.3% | 66.4% |

Table 5. **(Proportion of branches that contain both well-aligned and poorly-aligned images when branching from different timesteps)** The number of denoising timesteps  $T$  is set to 20. We sample 256 branches each time, and each branch contains 3 images. The differences in alignment results under the same branch are widespread.

**Compatibility with DPOK.** DPOK also uses value function and clipping in their implementation. Same with PG, we replace value function with reward normalization. Therefore, the gradient of our method when compatible with DPOK goes as Eq. (7).

$$\mathbb{E} \left( \sum_{t=1}^{\tau} \left[ -\alpha \nabla_{\theta} \log p_{\theta}(\mathbf{x}_{t-1}^{+} | \mathbf{x}_t^{+}, \mathbf{c}) \hat{r}^{+} + \beta \nabla_{\theta} \text{KL}(p_{\theta}(\mathbf{x}_{t-1}^{+} | \mathbf{x}_t^{+}, \mathbf{c}) || p_{\theta_{\text{old}}}(\mathbf{x}_{t-1}^{+} | \mathbf{x}_t^{+}, \mathbf{c})) - \alpha \nabla_{\theta} \log p_{\theta}(\mathbf{x}_{t-1}^{-} | \mathbf{x}_t^{-}, \mathbf{c}) \hat{r}^{-} + \beta \nabla_{\theta} \text{KL}(p_{\theta}(\mathbf{x}_{t-1}^{-} | \mathbf{x}_t^{-}, \mathbf{c}) || p_{\theta_{\text{old}}}(\mathbf{x}_{t-1}^{-} | \mathbf{x}_t^{-}, \mathbf{c})) \right] \right). \quad (7)$$

**Compatibility with Direct Preference Optimization.** In contrastive sample pairs, the positive samples are more preferred than negative samples. Therefore, we can apply direct preference optimization (DPO). The gradient of our method when compatible with DPO goes as Eq. (8).

$$-\mathbb{E} \left( \sum_{t=1}^{\tau} \left[ \frac{p_{\theta}(\mathbf{x}_{t-1}^{+} | \mathbf{x}_t^{+}, \mathbf{c})}{p_{\theta_{\text{old}}}(\mathbf{x}_{t-1}^{+} | \mathbf{x}_t^{+}, \mathbf{c})} \nabla_{\theta} \log p_{\theta}(\mathbf{x}_{t-1}^{+} | \mathbf{x}_t^{+}, \mathbf{c}) - \frac{p_{\theta}(\mathbf{x}_{t-1}^{-} | \mathbf{x}_t^{-}, \mathbf{c})}{p_{\theta_{\text{old}}}(\mathbf{x}_{t-1}^{-} | \mathbf{x}_t^{-}, \mathbf{c})} \nabla_{\theta} \log p_{\theta}(\mathbf{x}_{t-1}^{-} | \mathbf{x}_t^{-}, \mathbf{c}) \right] \right). \quad (8)$$

## D.2. Discussion on Value Function

A value function  $V(x_t, c)$  is usually used in policy gradient training. By subtracting  $r(x_0, c)$  with  $V(x_t, c)$ , the variance of gradient estimation can be minimized [17]. However, we do not employ value function in our implementation.

Branch-based sampling and reward normalization have the same effect as value function. Since value function is trained to minimize  $E_{p_{\theta}(x_{0:t})} (r(x_0, c) - V(x_t, c))^2$ , the state value  $V(x_t, c)$  approximately equals to the mean score of the  $x_0$ s denoised from the given  $x_t$ . In our approach, reward normalization, as detailed in Appendix D.1, normalizes the score/reward using  $\frac{\text{score} - \text{mean}}{\text{variance}}$ , similar to the effect of applying value function (i.e.,  $(r(x_0, c) - V(x_t, c))$ ). Simultaneously, branch-based sampling provides additional samples denoised from the given  $x_{\tau}$ , which improves the estimation of the mean score. Moreover, the contrastive samples are denoised from the same  $x_{\tau}$ , with differences in their rewards reflecting variations in the denoising process from  $x_{\tau}$  to  $x_0$ . By constructing pair-wise contrastive samples, branch-based sampling (BS) introduces reward signals that are independent of previous timesteps, helping to estimate the reward of  $x_{\tau}$  accurately. This is also why applying BPT+BS consistently outperforms only applying BPT in our experiments.

---

**Algorithm 1:** Pseudo-code of B<sup>2</sup>-DiffuRL for one training round.

**Input :** Denoising timesteps  $T$ , inner epoch  $E$ , number of samples each round  $N$ , prompt list  $C$ , number of branches  $K$ , training interval  $[\tau, 1]$ , reward function  $r$ , pretrained diffusion model  $p_\theta$

```
.  
pold = deepcopy(pθ) ;  
pold.require_grad(False) ;  
// Sampling  
Dsampling = {} ;  
for  $n \leftarrow 1$  to  $N$  do  
    Randomly choose a prompt  $c$  from  $C$  ;  
    Randomly choose  $x_T$  from  $\mathcal{N}(0, I)$  ;  
     $x_{(T-1):\tau}$  = Denoise with  $p_\theta$  for  $(T - \tau)$  steps ;  
    for  $k \leftarrow 1$  to  $K$  do  
         $x_\tau^k$  = deepcopy( $x_\tau$ ) ;  
         $x_{(\tau-1):0}^k$  = Denoise with  $p_\theta$  for  $\tau$  steps ;  
    end  
    Dsampling.push([ $x_{\tau:0}^{1:K}$ ,  $c$ ]) ;  
end  
// Evaluation  
Dtraining = {} ;  
for [ $x_{\tau:0}^{1:K}$ ,  $c$ ]  $\in$  Dsampling do  
     $s^{1:K}$  = normalization( $r(x_0^{1:K}, c)$ ) // Do normalization as Appendix D.1  
    if  $s^{1:K}$  contains both negative and positive scores then  
         $i = \text{argmax}(s^{1:K})$ ;  $j = \text{argmin}(s^{1:K})$  ;  
        Dtraining.push([ $x_t^i, x_{t-1}^i, s^i, x_t^j, x_{t-1}^j, s^j, c$ ]  $_{t=1:\tau}$ ) // Contrastive sample pairs  
    else  
         $i = \text{argmax}(\text{abs}(s^{1:K}))$  ;  
        Dtraining.push([ $x_t^i, x_{t-1}^i, s^i, c$ ]  $_{t=1:\tau}$ ) // Simple samples  
    end  
end  
// Training  
for  $e \leftarrow 1$  to  $E$  do  
     $D = \text{shuffle}(D_{\text{training}})$  ;  
    with grad ;  
    for  $d \in D$  do  
         $d = \text{shuffle}(d)$  ;  
        if  $d$  is a contrastive sample pair then  
            for [ $x_t^i, x_{t-1}^i, s^i, x_t^j, x_{t-1}^j, s^j, c$ ]  $\in d$  do  
                update  $\theta$  with gradient descent using Eq. (6) ;  
            end  
        else  
            for [ $x_t^i, x_{t-1}^i, s^i, c$ ]  $\in d$  do  
                update  $\theta$  with gradient descent using Eq. (4) ;  
            end  
        end  
    end  
end  
end
```

---



### D.3. Computational Cost

In experiments, it takes about 36 hours to reach 50 epochs using B<sup>2</sup>-DiffuRL, while DDPO takes about 60 hours. Computational cost mainly consists of two parts: sampling and training. In training, for a sample  $x_0$ , the vanilla training using RL algorithm needs to traverse the entire denoising process from  $x_T$  to  $x_0$ , while the training using BPT only needs to traverse from  $x_\tau$  to  $x_0$ , where  $\tau \leq T$ . Therefore, using BPT leads to lower training cost in training. As for sampling, using branch-based sampling (BS) indeed leads to higher computational cost. However, sampling is much faster than training, so B<sup>2</sup>-DiffuRL requires lower computational cost overall.

### D.4. Experimental Resources

We conducted experiments on 8 24GB NVIDIA 3090 GPUs. It took approximately 36 hours to reach 25.6k reward queries when rewarded by CLIPScore, and approximately 80 hours when rewarded by BERTScore (LLaVA inference would take much time).

### D.5. Hyperparameters

We list hyperparameters of our experiments in Table 6.

|           | Hyperparameter            | B <sup>2</sup> -DiffuRL | DDPO         |
|-----------|---------------------------|-------------------------|--------------|
| Sampling  | Denoising steps $T$       | 20                      | 20           |
|           | Noise Weight $\eta$       | 1.0                     | 1.0          |
|           | Guidance Scale            | 5.0                     | 5.0          |
|           | Batch size                | 8                       | 8            |
|           | Batch count               | 32                      | 32           |
|           | Number of Branches        | 3                       | -            |
| Optimizer | Optimizer                 | AdamW [37]              | AdamW        |
|           | Learning rate             | 1e-4                    | 1e-4         |
|           | Weight decay              | 1e-4                    | 1e-4         |
|           | $(\beta_1, \beta_2)$      | (0.9, 0.999)            | (0.9, 0.999) |
|           | $\epsilon$                | 1e-8                    | 1e-8         |
| Training  | Batch size                | 2                       | 2            |
|           | Grad. accum. steps        | 32                      | 128          |
|           | Initial training interval | [14, 1]                 | -            |
|           | Score threshold           | 0.5                     | -            |

Table 6. Hyperparameters of our experiments.

### E. Pseudo-code

The pseudo-code of B<sup>2</sup>-DiffuRL for one training round goes as Algorithm 1.

### F. Discussion on Evaluation Metrics

#### F.1. Comparison between BERTScore and CLIPScore

We create a dataset containing 768 pairs of similar images generated by diffusion models with 20 denoising steps. The

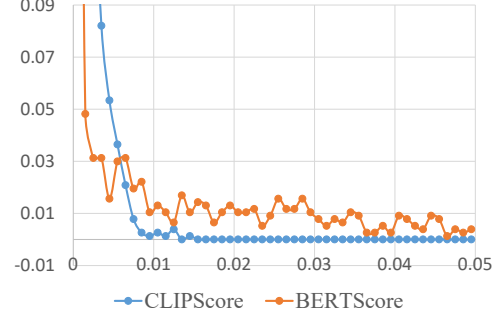

(a) Distribution of score differences for similar image pairs.

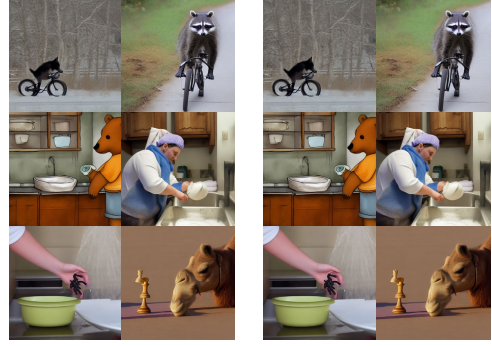

(b) Examples of similar image pairs.

Figure 12. (a) Distribution curve of score differences for similar image pairs when evaluated by CLIPScore and BERTScore. (b) Examples of similar image pairs.

two images in the same pair share the same states in the first 19 denoising steps, and only differ in the last denoising step. Some examples are shown in Figure 12 (b), and we can't tell the difference between them with our eyes. But they are different images, since their file size in JPEG format are different. Since images in same pairs are visually indistinguishable, they should receive similar prompt-image alignment scores.

However, BERTScores of similar image pairs differ a lot in our observation. Figure 12 (a) shows the distribution curves of score differences for similar image pairs, evaluated on CLIPScore and BERTScore. For CLIPScore, we can observe that almost all similar images have a score difference of less than 0.01. But for BERTScore, in the interval where the score difference is greater than 0.01, there are still many similar image pairs. As we can see from Figure 6 (a), after fine-tuning the model, BERTScores of the generated images increase by 0.01-0.03. In consideration of accurate rewarding and evaluation, it is intolerable that the score difference of similar images is greater than 0.01. Therefore, we recommend using CLIPScore as reward function instead of BERTScore.

## F.2. Introduction to Inception Score

Following previous works [2, 4, 7, 73], we use inception score (IS) as the metric of image diversity. Inception score is primarily applied as an evaluation metric for GANs [18]. It uses a pretrained inception v3 model [61] to predict the conditional label distribution  $P(y | x)$ . Then the inception score is calculated as detailed in Eq. (9):

$$IS = \exp(\mathbb{E}_x(KL(p(y | x) || P(y)))), \quad (9)$$

where  $KL$  is Kullback-Leibler divergence. Traditional Inception v3 is trained only on ImageNet [12], while Stable Diffusion is trained on a large-scale dataset. In real implementation, in order to better measure the diversity of images, we replace it by the image encoder of CLIP for calculating IS. A higher inception score represents better image diversity.

## G. More Samples

In this section, we show more samples generated by the diffusion models fine-tuned with our method B<sup>2</sup>-DiffuRL. Figure 13 shows more samples generated by our method compared with DDPO, DPO, PG and DPO on template 1. Figure 14 and 15 show more samples from our method on template 2 and 3 respectively. Figure 16 shows more samples of generalization to unseen prompts.

In Figure 17, more samples are generated on three given prompts to show the diversity of different methods. As we can see, most images generated by DDPO adopt a cartoon-like style, as described in their paper [8]. Especially for the images generated on the prompt “*a fox riding a bike*”, almost all the background information is lost and becomes a single color. On the contrary, the images generated by our method can almost keep the same style as SD, mitigating the problem of diversity reduction.

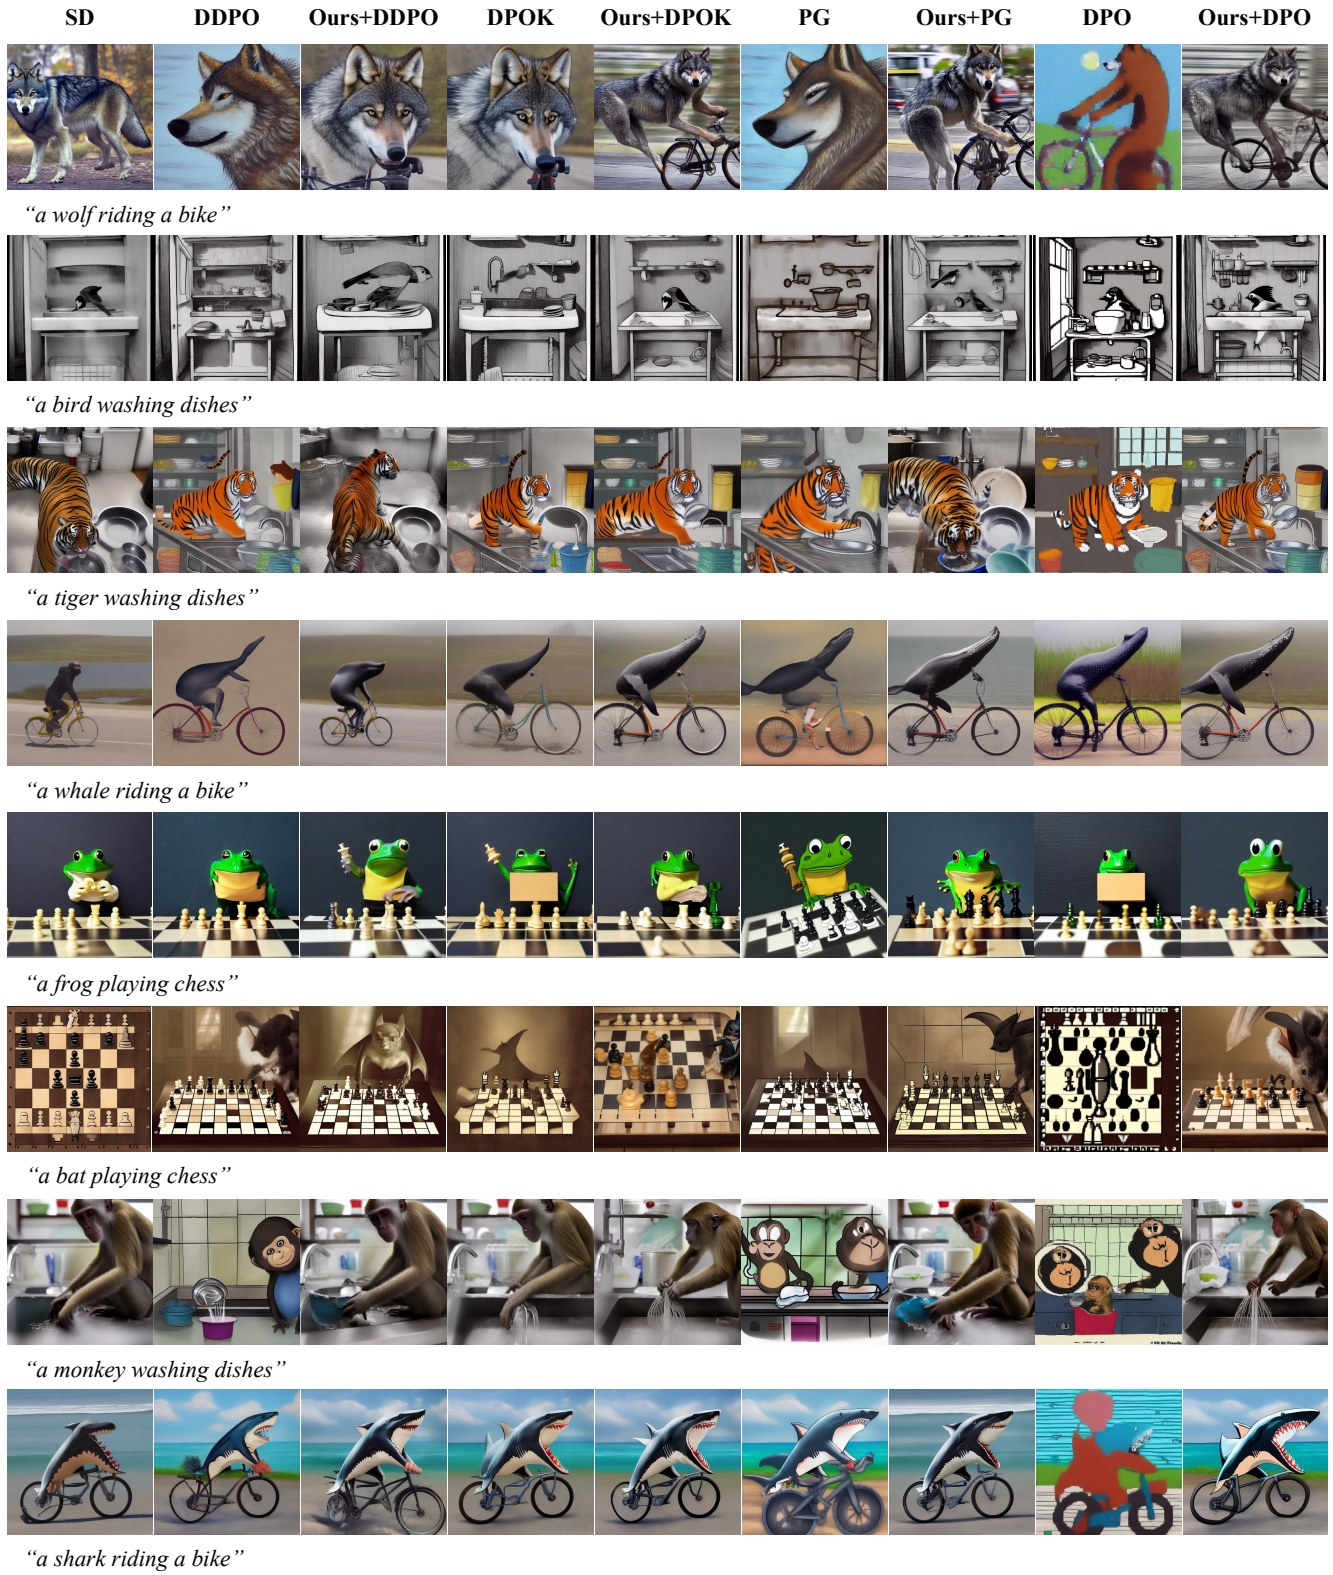

Figure 13. More samples generated by our method compared with other methods on template 1.



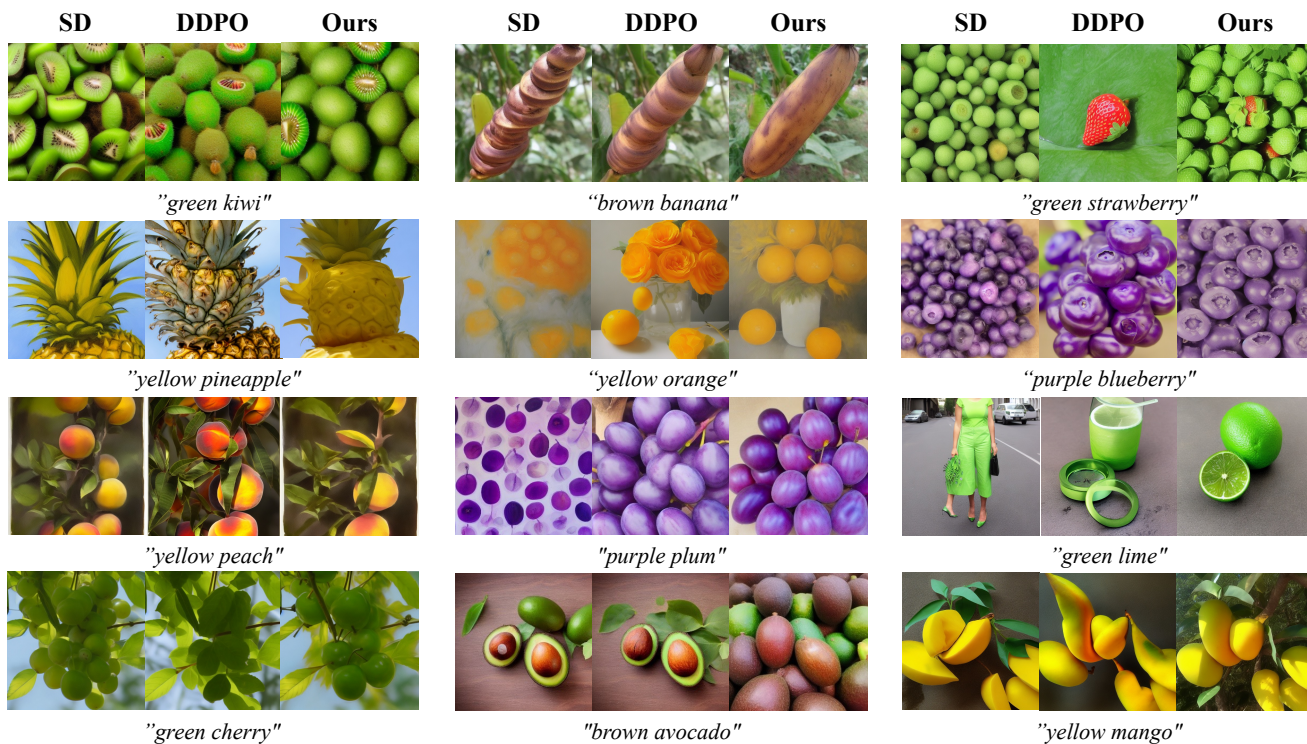

Figure 14. More samples generated by our method on template 2.

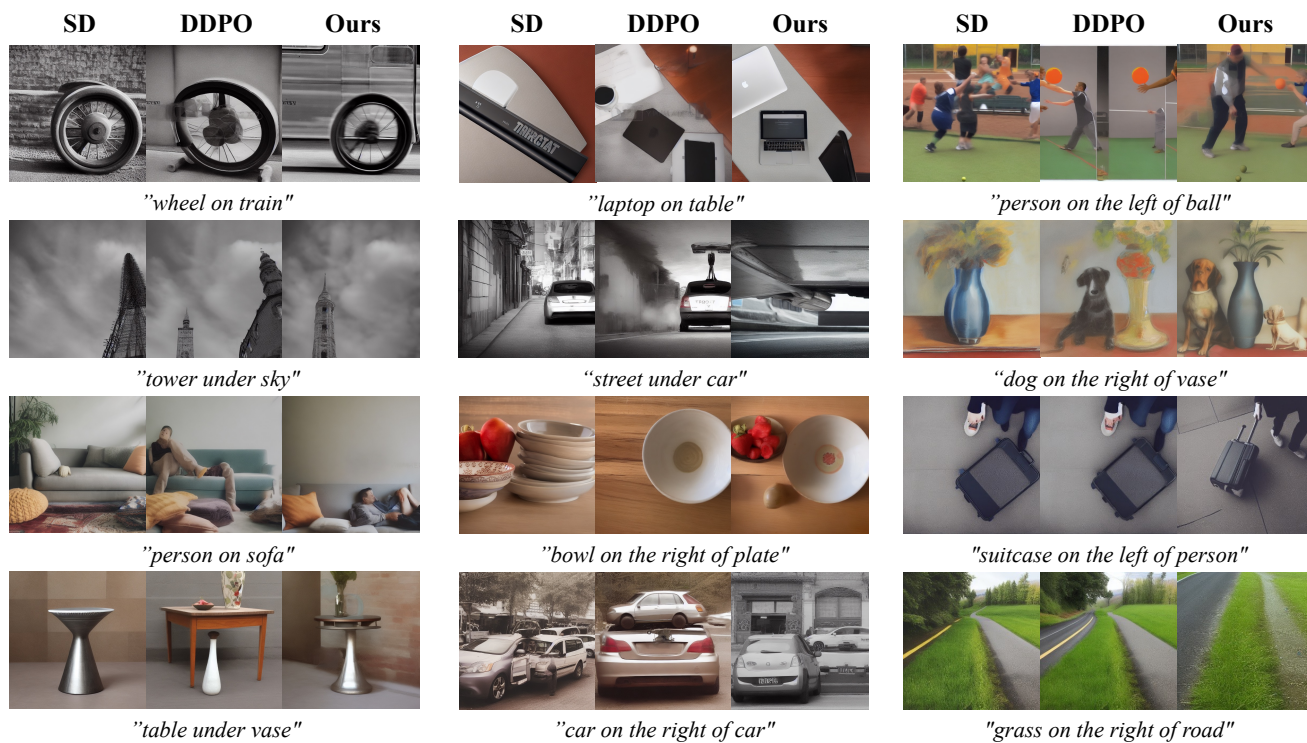

Figure 15. More samples generated by our method on template 3.



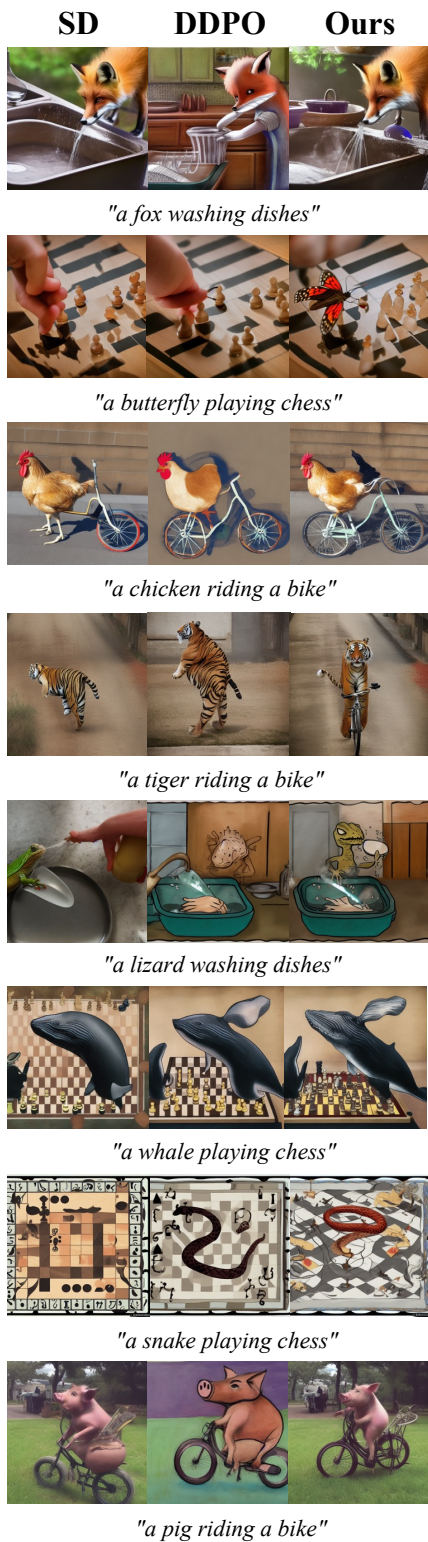

**(a) Template 1**

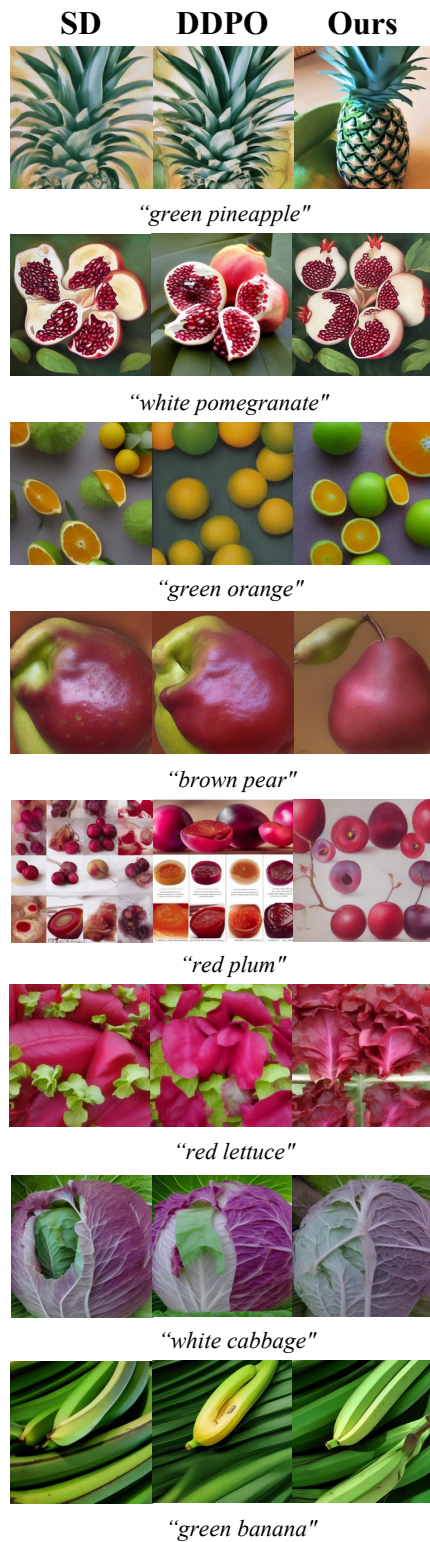

**(b) Template 2**

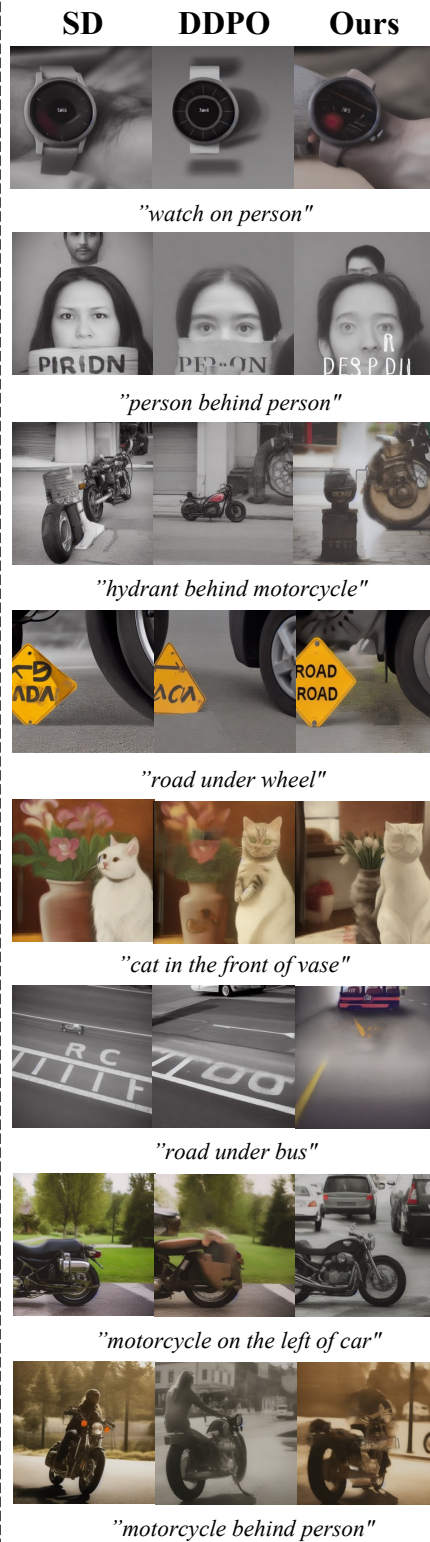

**(c) Template 3**

Figure 16. More samples of generalization to unseen prompts in template 1, 2 and 3.



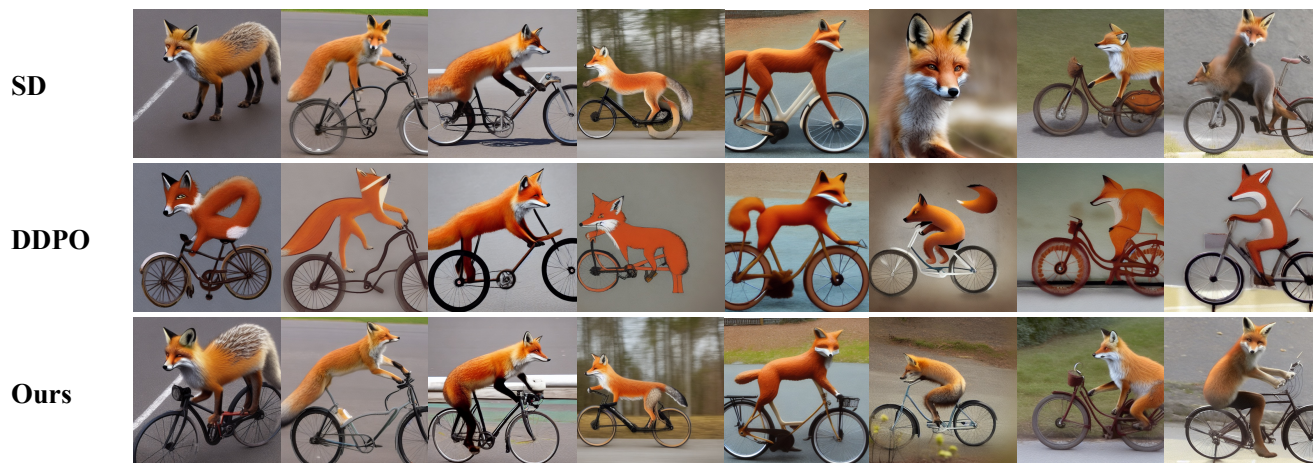

*"a fox riding a bike"*

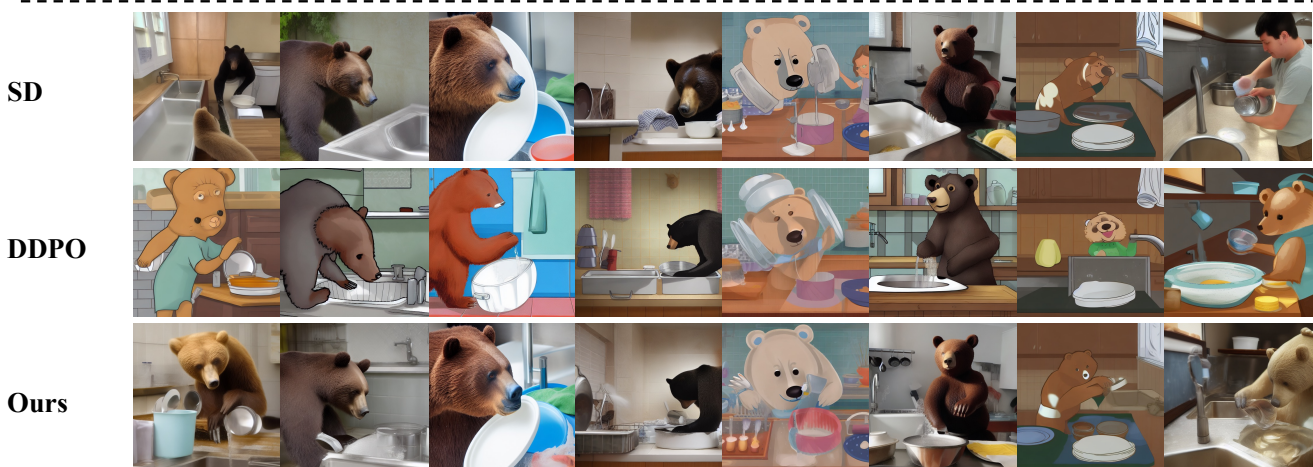

*"a bear washing dishes"*

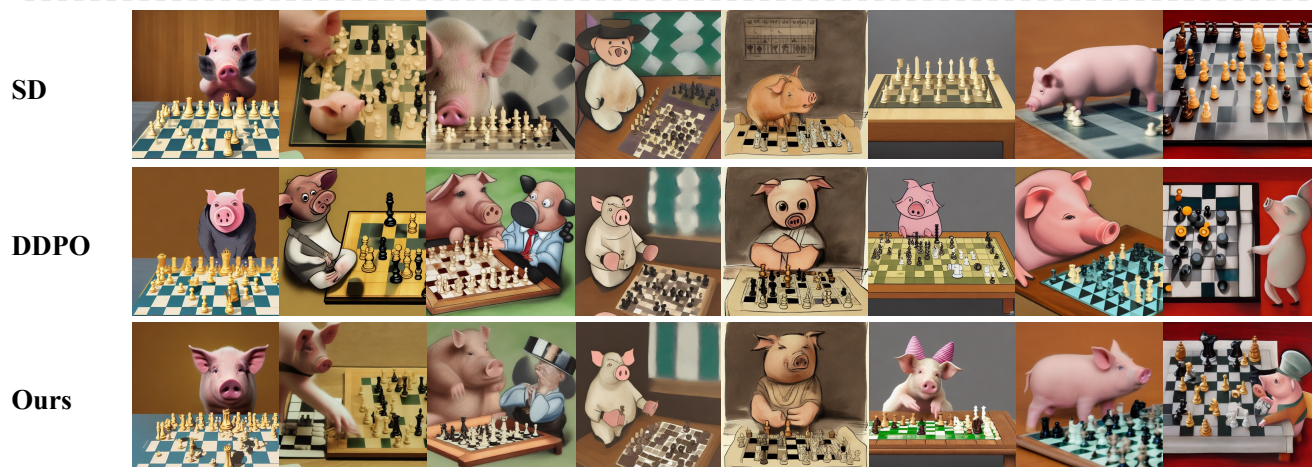

*"a pig playing chess"*

Figure 17. More samples generated by SD, DDPO and our method on three prompts. The images generated by DDPO tend to adopt a cartoon style, while those by our method tend to keep original styles of SD. These samples show that our method can help mitigating the image diversity reduction during fine-tuning.

## H. Prompt Lists

In this section, we provide the prompt lists used in our experiments. For each template, we collect one prompt list for training, and the other one for generalization test, as shown in Table 7, 8 and 9.

| Training list                                                                                                                                                                                                                                                                                                                                                                                                                                                                                                                                                                                                                                                                                                                                                                          |                                                                                                                                                                                                                                                                                                                                                                                                                                                                                                                                                                                                                                                                                                                                                                                        |                                                                                                                                                                                                                                                                                                                                                                                                                                                                                                                                                                                                                                                                                                                                                                                |
|----------------------------------------------------------------------------------------------------------------------------------------------------------------------------------------------------------------------------------------------------------------------------------------------------------------------------------------------------------------------------------------------------------------------------------------------------------------------------------------------------------------------------------------------------------------------------------------------------------------------------------------------------------------------------------------------------------------------------------------------------------------------------------------|----------------------------------------------------------------------------------------------------------------------------------------------------------------------------------------------------------------------------------------------------------------------------------------------------------------------------------------------------------------------------------------------------------------------------------------------------------------------------------------------------------------------------------------------------------------------------------------------------------------------------------------------------------------------------------------------------------------------------------------------------------------------------------------|--------------------------------------------------------------------------------------------------------------------------------------------------------------------------------------------------------------------------------------------------------------------------------------------------------------------------------------------------------------------------------------------------------------------------------------------------------------------------------------------------------------------------------------------------------------------------------------------------------------------------------------------------------------------------------------------------------------------------------------------------------------------------------|
| a cat washing dishes<br>a monkey washing dishes<br>a spider washing dishes<br>a deer washing dishes<br>a lion washing dishes<br>a raccoon riding a bike<br>a lizard riding a bike<br>a butterfly riding a bike<br>a whale riding a bike<br>a mouse riding a bike<br>a turtle playing chess<br>a duck playing chess<br>a pig playing chess<br>a llama playing chess<br>a gorilla playing chess                                                                                                                                                                                                                                                                                                                                                                                          | a dog washing dishes<br>a rabbit washing dishes<br>a bird washing dishes<br>a cow washing dishes<br>a tiger washing dishes<br>a fox riding a bike<br>a beetle riding a bike<br>a fish riding a bike<br>a dolphin riding a bike<br>a rat riding a bike<br>a frog playing chess<br>a goose playing chess<br>a turkey playing chess<br>a camel playing chess<br>a hedgehog playing chess                                                                                                                                                                                                                                                                                                                                                                                                  | a horse washing dishes<br>a zebra washing dishes<br>a sheep washing dishes<br>a goat washing dishes<br>a bear washing dishes<br>a wolf riding a bike<br>a ant riding a bike<br>a shark riding a bike<br>a squirrel riding a bike<br>a snake riding a bike<br>a chicken playing chess<br>a bee playing chess<br>a fly playing chess<br>a bat playing chess<br>a kangaroo playing chess                                                                                                                                                                                                                                                                                                                                                                                          |
| Test list                                                                                                                                                                                                                                                                                                                                                                                                                                                                                                                                                                                                                                                                                                                                                                              |                                                                                                                                                                                                                                                                                                                                                                                                                                                                                                                                                                                                                                                                                                                                                                                        |                                                                                                                                                                                                                                                                                                                                                                                                                                                                                                                                                                                                                                                                                                                                                                                |
| a cat riding a bike<br>a dog playing chess<br>a monkey riding a bike<br>a rabbit playing chess<br>a spider riding a bike<br>a bird playing chess<br>a deer riding a bike<br>a cow playing chess<br>a lion riding a bike<br>a tiger playing chess<br>a raccoon washing dishes<br>a fox playing chess<br>a lizard washing dishes<br>a beetle playing chess<br>a butterfly washing dishes<br>a fish playing chess<br>a whale washing dishes<br>a dolphin playing chess<br>a mouse washing dishes<br>a rat playing chess<br>a turtle washing dishes<br>a frog riding a bike<br>a duck washing dishes<br>a goose riding a bike<br>a pig washing dishes<br>a turkey riding a bike<br>a llama washing dishes<br>a camel riding a bike<br>a gorilla washing dishes<br>a hedgehog riding a bike | a cat playing chess<br>a horse riding a bike<br>a monkey playing chess<br>a zebra riding a bike<br>a spider playing chess<br>a sheep riding a bike<br>a deer playing chess<br>a goat riding a bike<br>a lion playing chess<br>a bear riding a bike<br>a raccoon playing chess<br>a wolf washing dishes<br>a lizard playing chess<br>a ant washing dishes<br>a butterfly playing chess<br>a shark washing dishes<br>a whale playing chess<br>a squirrel washing dishes<br>a mouse playing chess<br>a snake washing dishes<br>a turtle riding a bike<br>a chicken washing dishes<br>a duck riding a bike<br>a bee washing dishes<br>a pig riding a bike<br>a fly washing dishes<br>a llama riding a bike<br>a bat washing dishes<br>a gorilla riding a bike<br>a kangaroo washing dishes | a dog riding a bike<br>a horse playing chess<br>a rabbit riding a bike<br>a zebra playing chess<br>a bird riding a bike<br>a sheep playing chess<br>a cow riding a bike<br>a goat playing chess<br>a tiger riding a bike<br>a bear playing chess<br>a fox washing dishes<br>a wolf playing chess<br>a beetle washing dishes<br>a ant playing chess<br>a fish washing dishes<br>a shark playing chess<br>a dolphin washing dishes<br>a squirrel playing chess<br>a rat washing dishes<br>a snake playing chess<br>a frog washing dishes<br>a chicken riding a bike<br>a goose washing dishes<br>a bee riding a bike<br>a turkey washing dishes<br>a fly riding a bike<br>a camel washing dishes<br>a bat riding a bike<br>a hedgehog washing dishes<br>a kangaroo riding a bike |

Table 7. Prompt Lists for template 1.

| Training list                                                                                                                                                                                                                                              |                                                                                                                                                                                                                         |                                                                                                                                                                                                                             |
|------------------------------------------------------------------------------------------------------------------------------------------------------------------------------------------------------------------------------------------------------------|-------------------------------------------------------------------------------------------------------------------------------------------------------------------------------------------------------------------------|-----------------------------------------------------------------------------------------------------------------------------------------------------------------------------------------------------------------------------|
| red apple<br>brown banana<br>red strawberry<br>green grape<br>brown kiwi<br>yellow mango<br>yellow pineapple<br>yellow peach<br>blue blueberry<br>green raspberry<br>green lime<br>brown avocado<br>red pomegranate<br>red grapefruit                      | green apple<br>orange orange<br>green strawberry<br>red watermelon<br>green kiwi<br>green pear<br>brown pineapple<br>purple plum<br>purple blueberry<br>yellow lemon<br>yellow lime<br>red cherry<br>pink pomegranate   | yellow banana<br>yellow orange<br>purple grape<br>green watermelon<br>orange mango<br>yellow pear<br>orange peach<br>green plum<br>red raspberry<br>green lemon<br>green avocado<br>green cherry<br>pink grapefruit         |
| Test list                                                                                                                                                                                                                                                  |                                                                                                                                                                                                                         |                                                                                                                                                                                                                             |
| yellow apple<br>white strawberry<br>white kiwi<br>green pineapple<br>black blueberry<br>white lime<br>white pomegranate<br>white broccoli<br>brown spinach<br>white zucchini<br>green garlic<br>purple cauliflower<br>white peas<br>white brussels sprouts | green banana<br>black grape<br>green mango<br>red peach<br>black raspberry<br>yellow avocado<br>yellow grapefruit<br>yellow tomato<br>red lettuce<br>white sweet potato<br>white celery<br>green eggplant<br>green corn | green orange<br>white watermelon<br>brown pear<br>red plum<br>white lemon<br>black cherry<br>white carrot<br>white cucumber<br>yellow bell pepper<br>green onion<br>white cabbage<br>purple asparagus<br>purple green beans |

Table 8. Prompt lists for template 2.

| Training list                                                                                                                                                                                                                                                                                                                                              |                                                                                                                                                                                                                                                                                                                                       |                                                                                                                                                                                                                                                                                                                                     |
|------------------------------------------------------------------------------------------------------------------------------------------------------------------------------------------------------------------------------------------------------------------------------------------------------------------------------------------------------------|---------------------------------------------------------------------------------------------------------------------------------------------------------------------------------------------------------------------------------------------------------------------------------------------------------------------------------------|-------------------------------------------------------------------------------------------------------------------------------------------------------------------------------------------------------------------------------------------------------------------------------------------------------------------------------------|
| chair under umbrella<br>wheel on train<br>tree under sky<br>dog on boat<br>person on street<br>person on sofa<br>table under vase<br>building on the right of building<br>kite on the right of kite<br>road on the left of grass<br>bowl on the right of plate<br>bottle on the right of person<br>car on the right of car<br>person on the left of person | table under umbrella<br>airplane on street<br>building under sky<br>tower under sky<br>laptop on table<br>glasses on face<br>street under car<br>suitcase on the left of person<br>person on the left of ball<br>grass on the right of road<br>building on the right of truck<br>box on the left of post<br>truck on the right of car | car on street<br>bag on street<br>street under sky<br>cup on shirt<br>table under laptop<br>sofa under person<br>dog on the right of vase<br>dog on the left of person<br>ball on the right of person<br>person on the left of pillow<br>person on the left of bottle<br>building on the left of building<br>car on the left of car |
| Test list                                                                                                                                                                                                                                                                                                                                                  |                                                                                                                                                                                                                                                                                                                                       |                                                                                                                                                                                                                                                                                                                                     |
| vase on table<br>jacket on person<br>person behind person<br>trees behind grass<br>truck in the front of building<br>road under bus<br>table under plate<br>car on the right of umbrella<br>bear on the right of person<br>motorcycle on the left of bus                                                                                                   | shirt on person<br>motorcycle on road<br>building behind trees<br>wheel in the front of wheel<br>cat in the front of vase<br>road under building<br>person under umbrella<br>phone on the right of monitor<br>bear on the left of person<br>motorcycle on the left of car                                                             | watch on person<br>motorcycle behind person<br>hydrant behind motorcycle<br>tower in the front of train<br>trash can in the front of cabinet<br>road under wheel<br>cone on the right of cone<br>person on the right of bear<br>car on the left of bus<br>road on the left of tree                                                  |

Table 9. Prompt lists for template 3.
